# Supplementary material for: Persistent multi-scale fluctuations shift European hydroclimate to its millennial boundaries
Source: PubMed Central journal article supplement (PMC5932079; doi:10.1038/s41467-018-04207-7), 2018-05-02
Supplement: 41467_2018_4207_MOESM1_ESM.pdf [file 41467_2018_4207_MOESM1_ESM.pdf]

1 **Persistent multi-scale fluctuations shift European**  
2 **hydroclimate to its millennial boundaries**

3 **Supplementary Material & Methods**

4 Y. Markonis\*<sup>1</sup>, M. Hanel<sup>1</sup>, P. Máca<sup>1</sup>, J. Kyselý<sup>1,2</sup> and E. R. Cook<sup>3</sup>

5 <sup>1</sup>Faculty of Environmental Sciences, Czech University of Life Sciences Prague, Kamýcká 129, Praha –  
6 Suchbát, 165 00, Czech Republic

7 <sup>2</sup>Institute of Atmospheric Physics, Czech Academy of Sciences, Spořilov, Prague 141 31, Prague 141 31,  
8 Czech Republic

9 <sup>3</sup>Lamont-Doherty Earth Observatory, Palisades, New York 10964, USA

10

11 *\*Corresponding author: imarkonis@fzp.czu.cz*

12

13

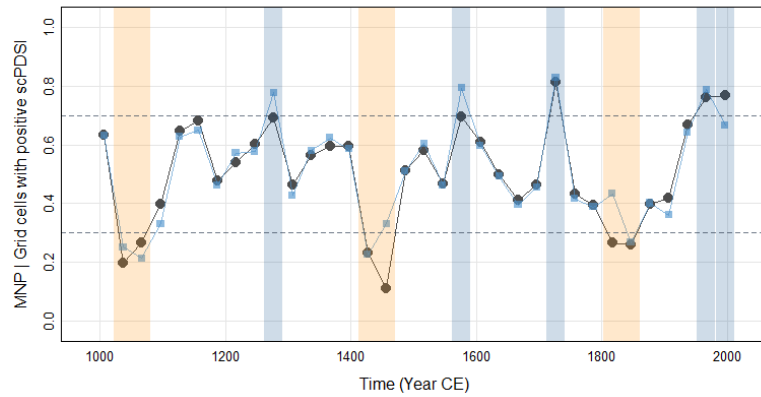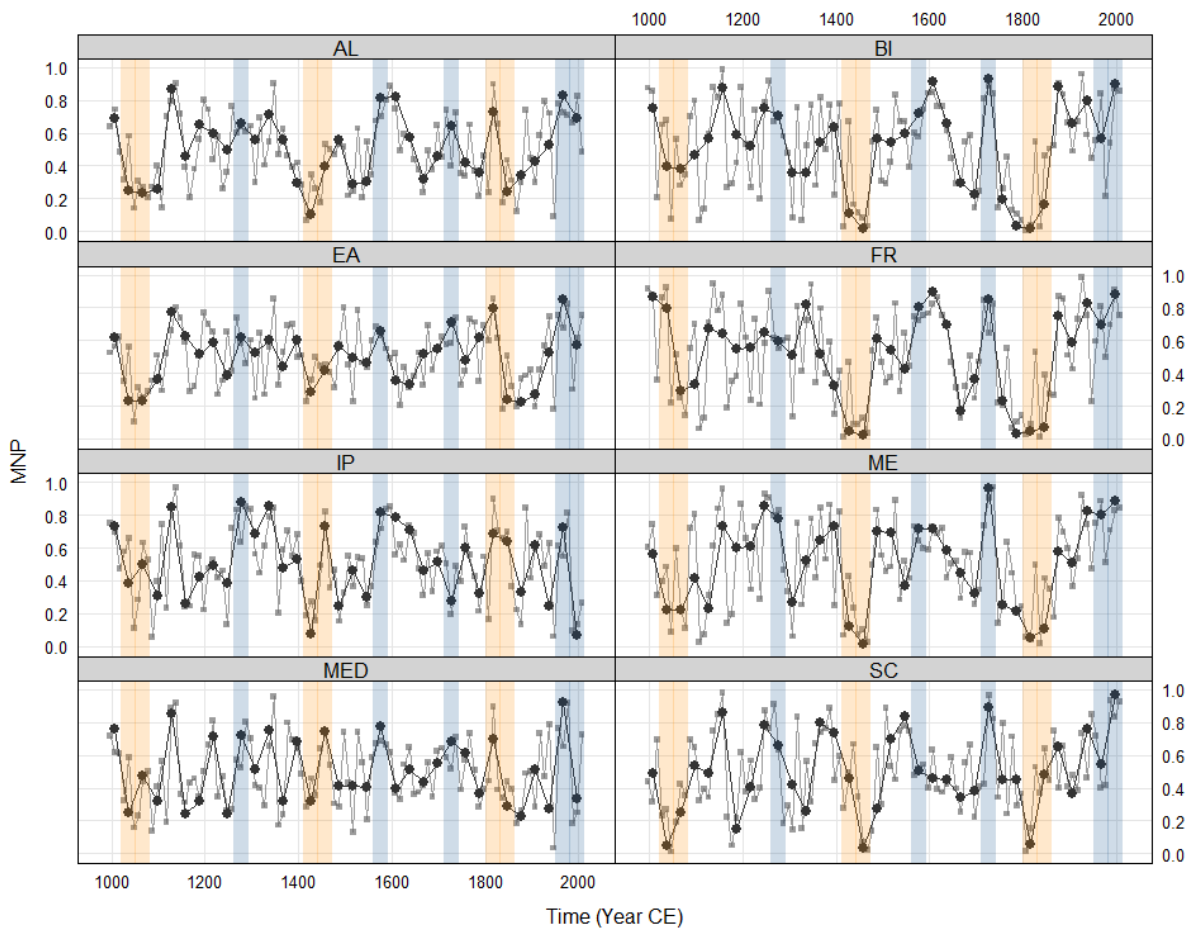

14

15

16

17

18

19

20

21

22

**Figure 1. a.** Mean of the non-exceedance probability (MNP) of the scPDSI for Europe at 30-year scale (black circled line) and percentage of grid cells that have positive scPDSI as a fraction of total number of grid cells (blue squared line). Grey dashed lines represent mean plus/minus one standard deviation of the scPDSI's MNP. **b.** MNP of the scPDSI for each PRUDENCE region (AL: Alps, BI: Britain Islands, EA: Eastern Europe, FR: France, IP: Iberian Peninsula, ME: Mid Europe, MED: Mediterranean, SC: Scandinavia) at 30-year scale (black) and 10-year scale (grey) and their relation to the dry (orange) and wet (blue) periods identified for the whole of Europe.

23

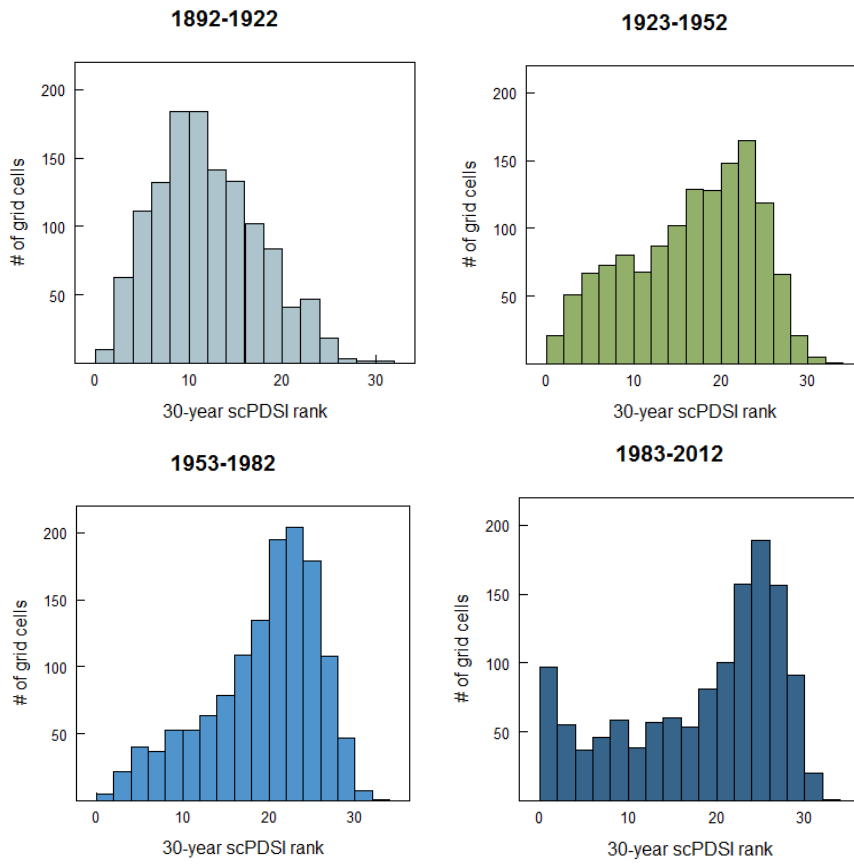

24  
25  
26  
27

**Figure 2.** Empirical distribution of 30-year scPDSI presented in Figure 3, in terms of absolute ranks. A value of 1 corresponds to the driest 30-year interval observed, while a value of 34 to the wettest one.

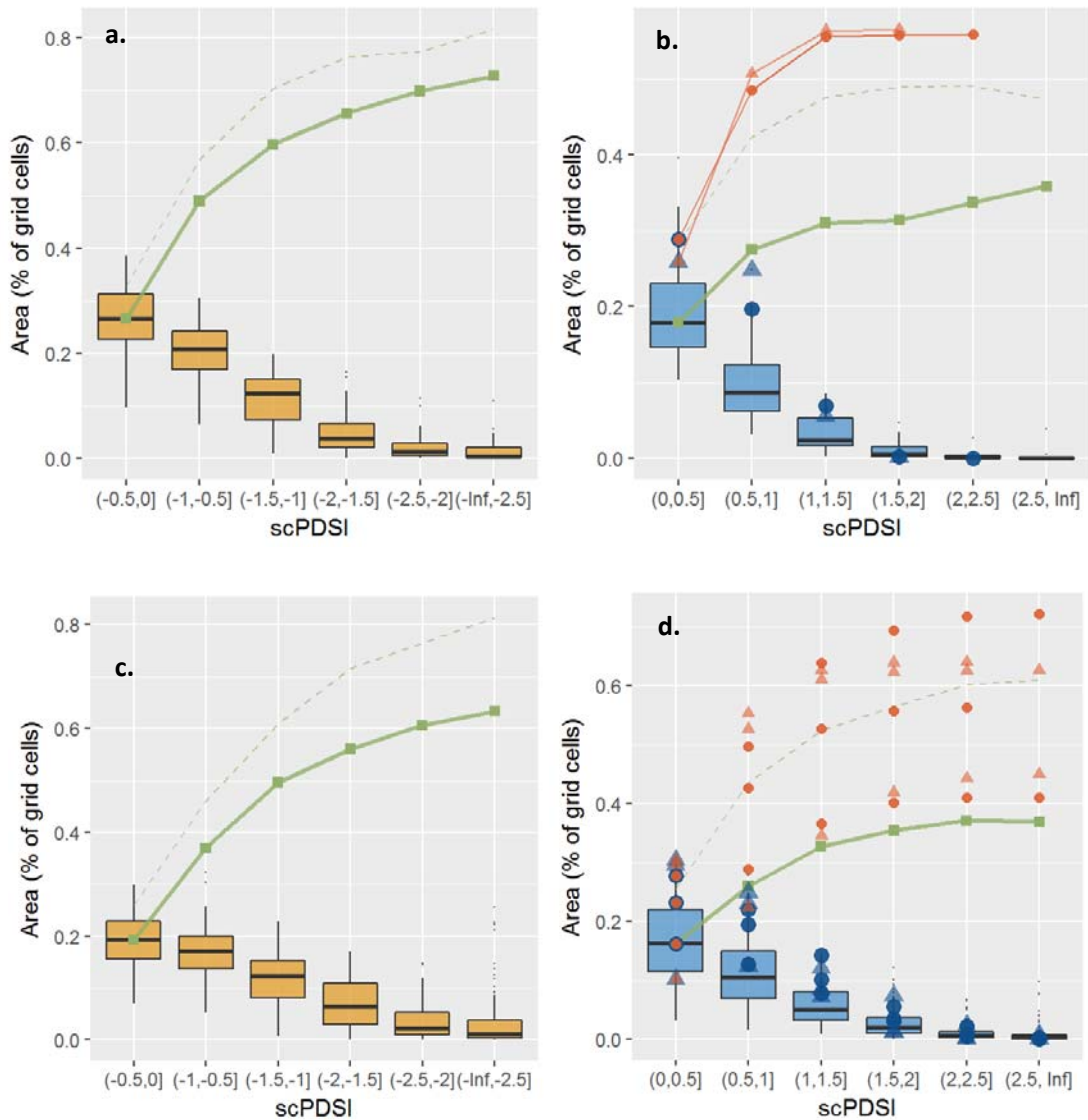

28

29

30 **Figure 3.** Investigation of areal extent, as percentage of total grid cell number, in conjunction to  
 31 the drought severity, described by the original scPDSI values at each grid cell. The dry (*orange*  
 32 *boxplots*) and wet (*blue boxplots*) conditions were examined for both 30-year (*a., b.*) and 10-  
 33 year scales (*c., d.*). Cumulative area of dry/wet conditions has been also presented by adding  
 34 the values of each successive bin (mean: *green square-pointed solid line*, 0.9 quantile: *green*  
 35 *slashed line*). The comparison of the W4.EU interval (*blue points*: mean scPDSI, *orange points*:  
 36 cumulative mean scPDSI; *triangles*: 1952-1982, *circles*: 1982-2012) with the other 10-/30-year  
 37 periods, suggests that it was above the cumulative 0.9 quantile in the 30-year scale. This was  
 38 due to its high values in the range between 0 and 1.5 and not as an outcome of extreme severe  
 39 conditions (scPDSI > 2). Similar results appear for the 10-year scale, where all the decades of  
 40 the last 60 years are found to be above the millennial mean, with three of them being in the top  
 41 0.1 quantile.

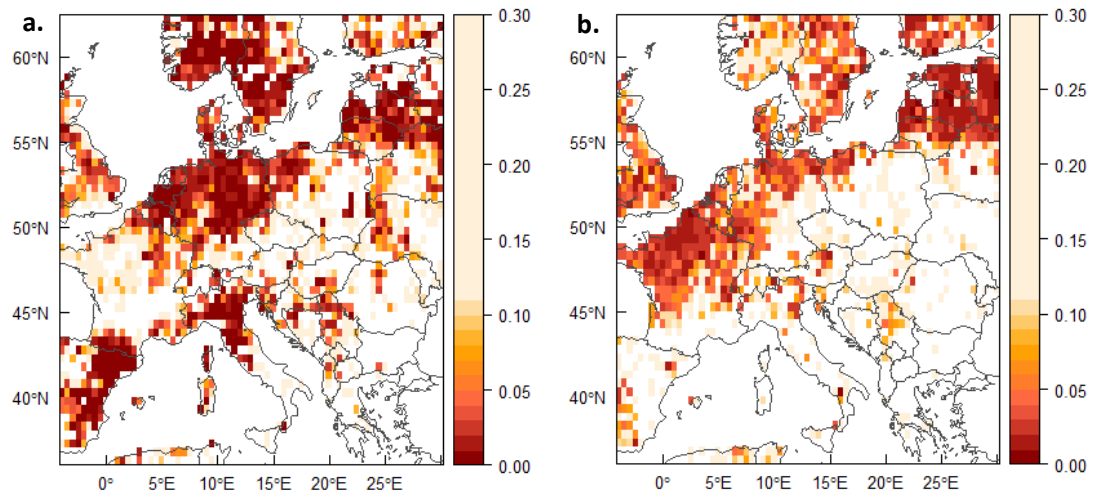

42

43 **Figure 4.** Statistical significance described as the rejection probability of the null hypothesis of  
 44 the maximum likelihood estimator (Eq. 2), which is used in logistic regression as depicted in  
 45 Figure 4 (a. Temperature and b. seasonal NAO).

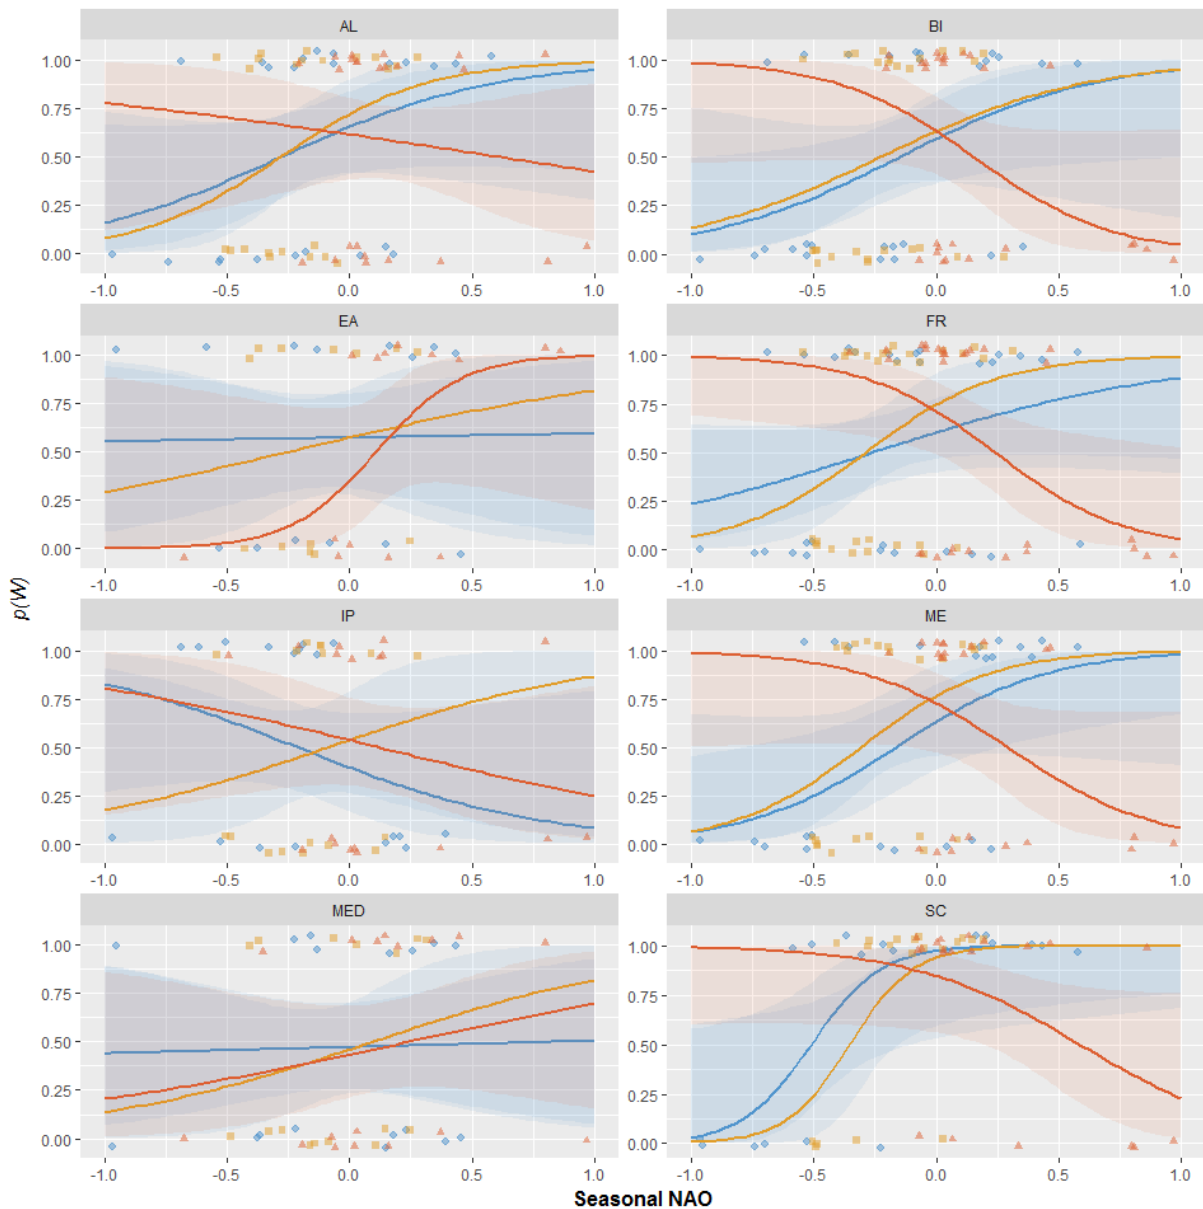

46

47 **Figure 5.** 10-year seasonal NAO values (*winter*: blue squares; *spring*: orange circles and  
 48 *summer*: red triangles) versus empirical probability of wet conditions per each PRUDENCE  
 49 region, i.e. extremely wet conditions are close to 1 while extremely dry close to 0. Continuous  
 50 lines represent the corresponding logistic regression fit for each NAO variable. The random  
 51 scattering of points over y axis was applied for clearer representation. Shaded area depicts the  
 52 0.95 confidence intervals.

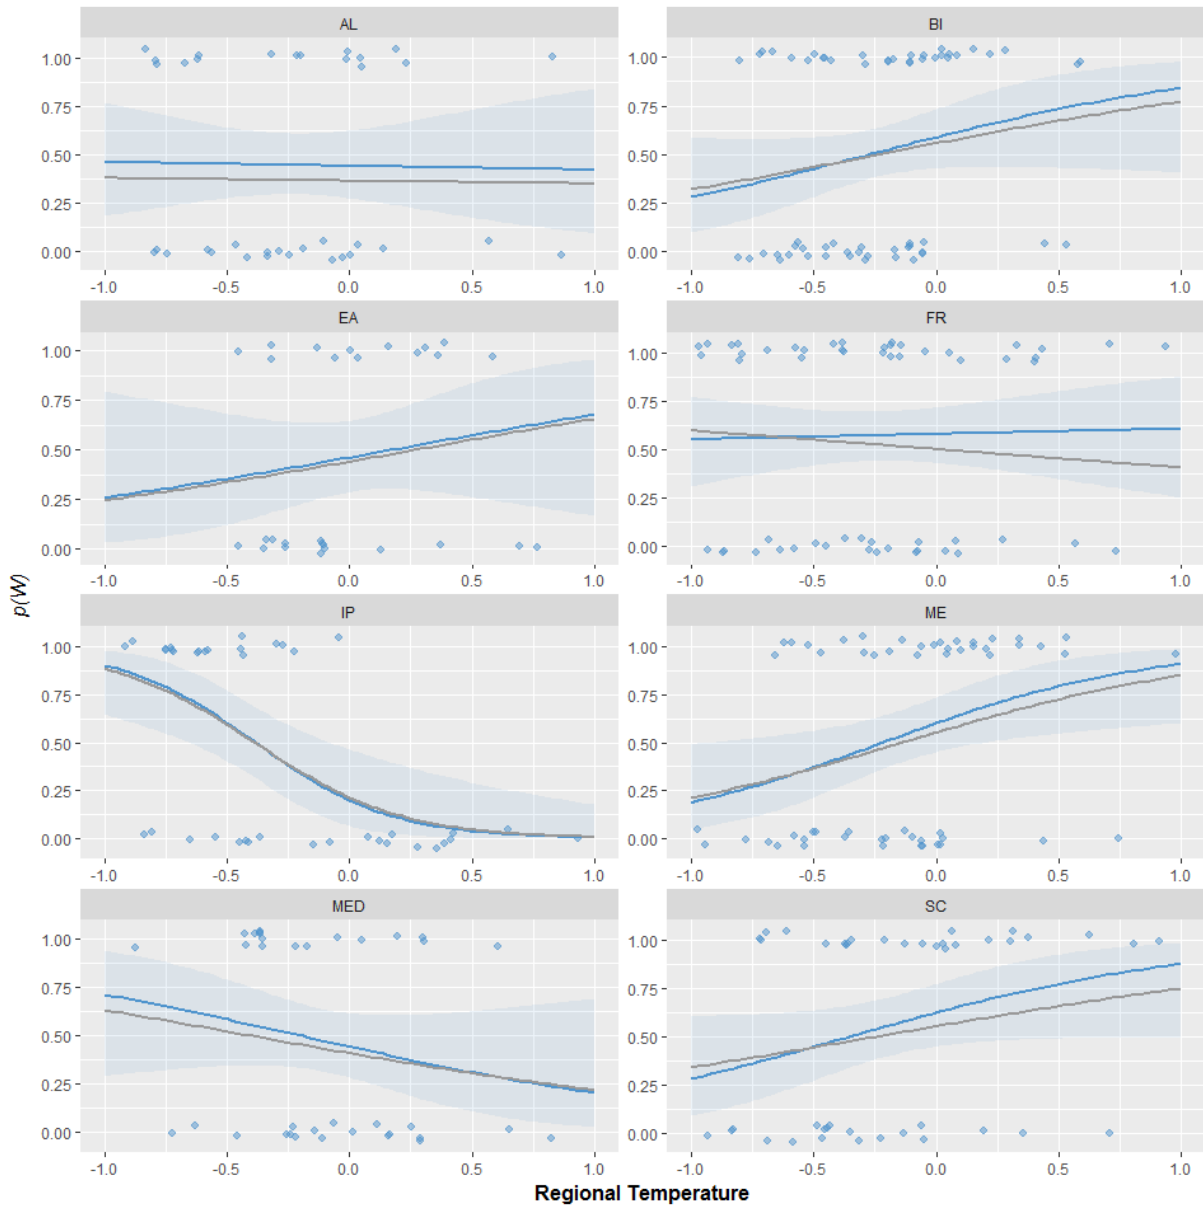

53  
54  
55  
56

**Figure 6.** Similar to Figure S8, but for regional temperature (blue line). Removing the last 112 years (all records end at 1900 CE) does not significantly change the shapes of the logistic regression curves (grey line).

57

58

59

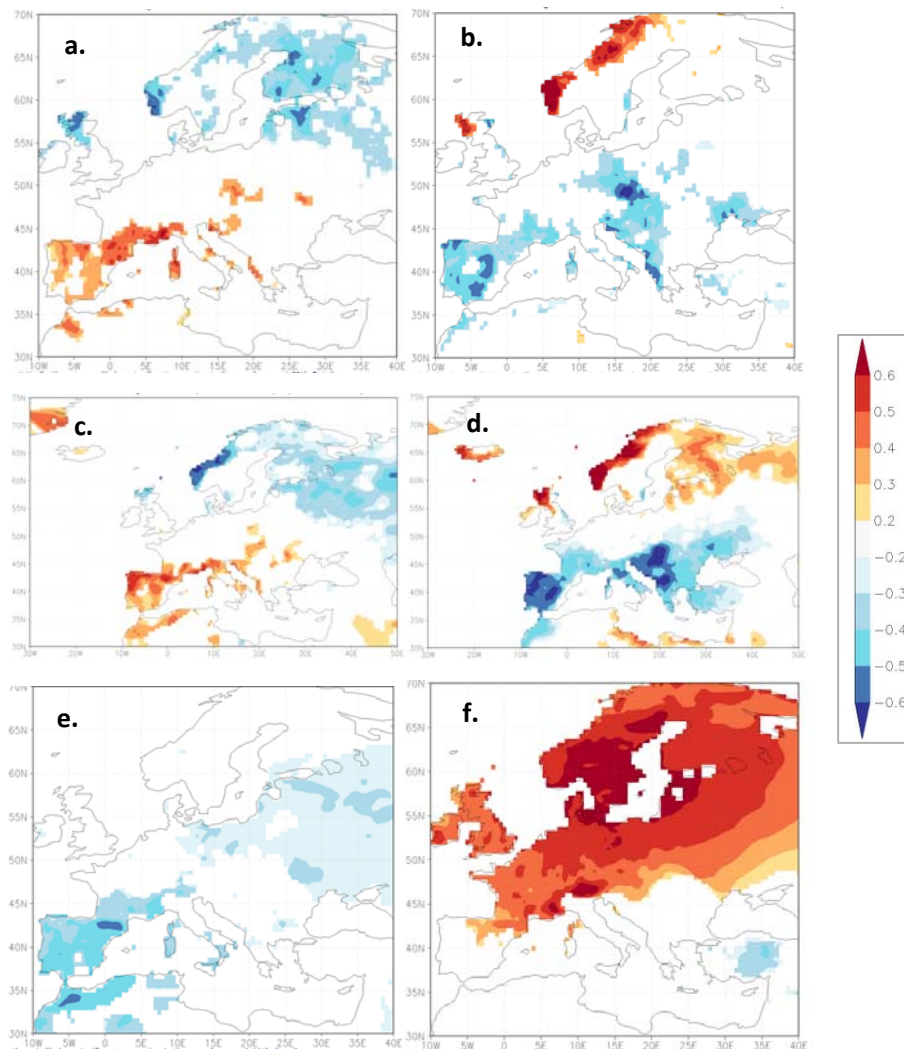

64

60 **Figure 7.** Correlation coefficients (0.9 significance) between CRU scPDSI 3.25 gridded dataset  
61 and annual **a.** SCA and **b.** AO. Similarly for precipitation (**c.**, **d.**) and temperature (**e.**, **f.**) (EOBS  
62 15.0 dataset). Data extraction and analysis were performed in the KNMI explorer on-line  
63 platform.



65 **Table 1.** Absolute ranks of regional mean scPDSI. On the top row for each region is the 10-year  
66 rank (maximum 104), while in the succeeding is the 30-year rank (maximum 34). Top/lowest  
67 20% percent of 30-year ranks is highlighted with blue/orange color.  
68

|               | 1897 | 1907 | 1917 | 1927 | 1937 | 1947 | 1957 | 1967 | 1977 | 1987 | 1997 | 2007 |
|---------------|------|------|------|------|------|------|------|------|------|------|------|------|
| <i>IP-10</i>  | 36   | 67   | 80   | 51   | 78   | 1    | 56   | 50   | 93   | 3    | 6    | 21   |
| <i>IP-30</i>  | 22   |      |      | 6    |      |      | 29   |      |      | 1    |      |      |
| <i>FR-10</i>  | 49   | 42   | 73   | 102  | 75   | 22   | 60   | 85   | 51   | 67   | 99   | 72   |
| <i>FR-30</i>  | 16   |      |      | 29   |      |      | 25   |      |      | 33   |      |      |
| <i>BI-10</i>  | 67   | 40   | 64   | 101  | 51   | 43   | 50   | 87   | 22   | 60   | 95   | 96   |
| <i>BI-30</i>  | 22   |      |      | 29   |      |      | 19   |      |      | 32   |      |      |
| <i>ME-10</i>  | 59   | 28   | 57   | 101  | 79   | 42   | 83   | 94   | 49   | 75   | 86   | 90   |
| <i>ME-30</i>  | 15   |      |      | 30   |      |      | 29   |      |      | 33   |      |      |
| <i>MED-10</i> | 52   | 31   | 91   | 48   | 94   | 1    | 92   | 70   | 102  | 6    | 14   | 88   |
| <i>MED-30</i> | 22   |      |      | 4    |      |      | 34   |      |      | 9    |      |      |
| <i>AL-10</i>  | 47   | 22   | 63   | 95   | 84   | 2    | 94   | 83   | 82   | 69   | 93   | 42   |
| <i>AL-30</i>  | 13   |      |      | 18   |      |      | 32   |      |      | 25   |      |      |
| <i>SC-10</i>  | 42   | 58   | 34   | 85   | 43   | 90   | 79   | 48   | 38   | 99   | 92   | 100  |
| <i>SC-30</i>  | 11   |      |      | 28   |      |      | 20   |      |      | 34   |      |      |
| <i>EA-10</i>  | 32   | 4    | 38   | 65   | 94   | 7    | 93   | 83   | 99   | 21   | 72   | 92   |
| <i>EA-30</i>  | 5    |      |      | 16   |      |      | 34   |      |      | 25   |      |      |

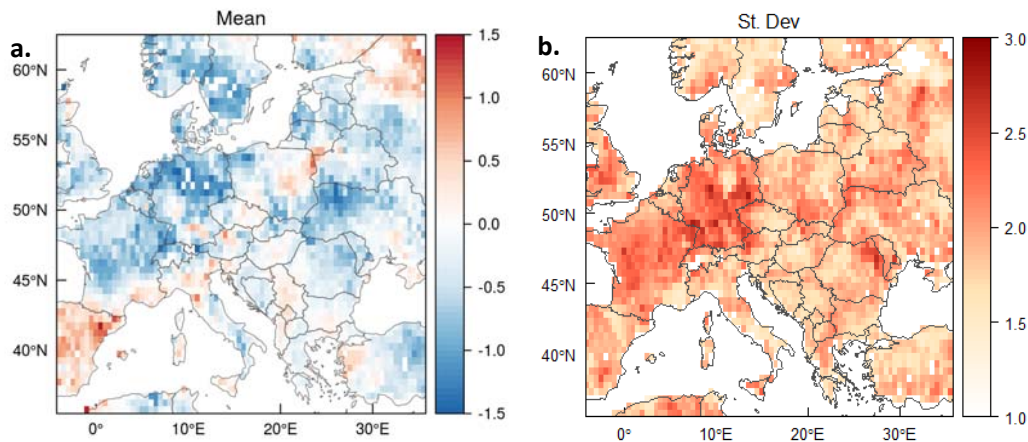

69

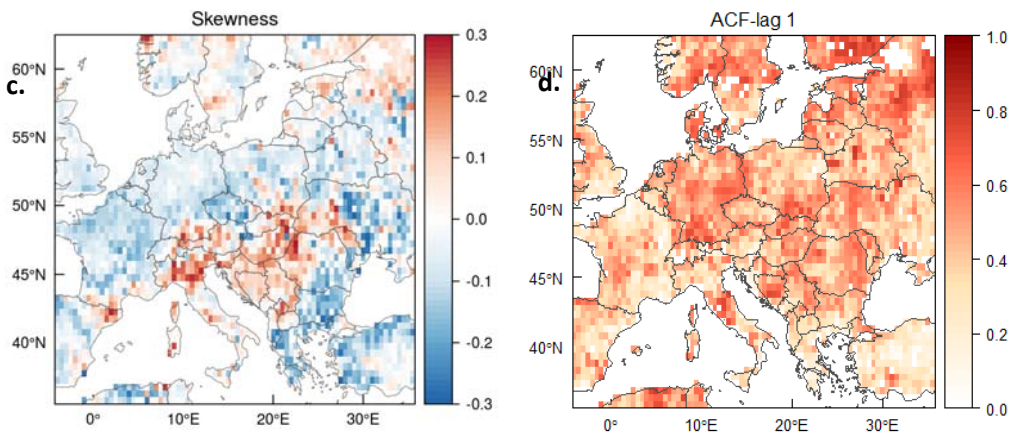

70

71 **Figure 8.** Spatial distribution of the statistical properties of the scPDSI: **a.** Mean, **b.** Standard  
 72 deviation, **c.** Skewness, **d.** Autocorrelation coefficient (lag 1 year). It can be seen that the  
 73 scPDSI mean deviates from zero; western mid and high latitudes demonstrate negative values,  
 74 whereas the Iberian peninsula the sign inverts. These departures occur due to the calibration  
 75 of OWDA to the instrumental period, i.e. 1928-1978, before it was applied to the tree-ring  
 76 proxies. Thus, if the calibration period is wetter than the whole record, it would result to a  
 77 negative mean value, whereas if it is dryer to a positive one. Therefore, to efficiently perform  
 78 comparisons between different regions, and consequently different calibration conditions, the  
 79 empirical quantiles of scPDSI were used.

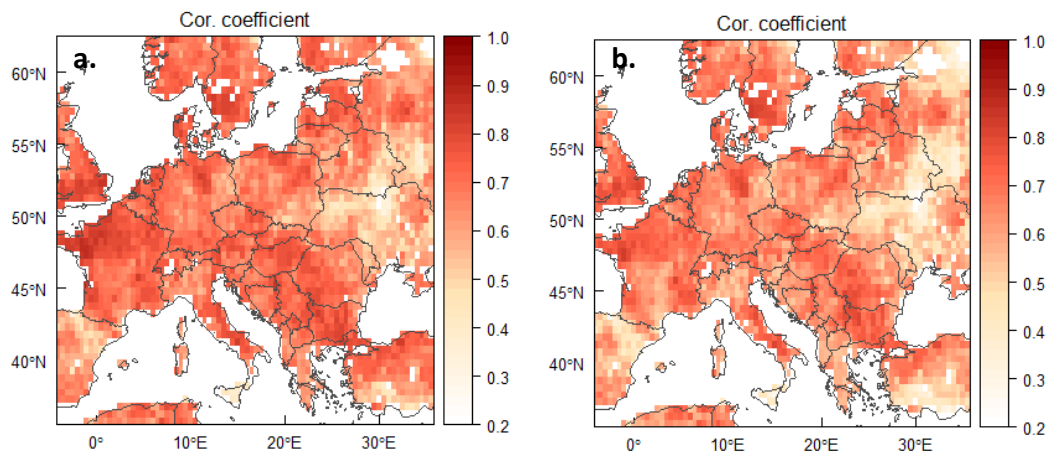

80  
 81 **Figure 9.** scPDSI correlation coefficient between OWDA (1900-2012) and CRU datasets for **a.**  
 82 summer ( $\rho = 0.67$ ) and **b.** annual time scale ( $\rho = 0.62$ ). These values are likely to be biased  
 83 upwards by some amount because the tree-ring estimates of the OWDA end in 1978. After  
 84 appropriate scaling, the OWDA is extended to 2012 using instrumental scPDSI data.  
 85

86 **Table 2.** Recent paleoclimatic studies of regional drought. There is good agreement with other  
 87 paleoclimatic studies as well. In the original paper, OWDA was found to be significantly  
 88 correlated with the gridded precipitation reconstruction over Europe<sup>1</sup>. The same can be said for  
 89 the Mediterranean<sup>2</sup>, the Iberian Peninsula<sup>3</sup>, Scandinavia<sup>4,5</sup>, United Kingdom<sup>6</sup> and Czech lands<sup>7</sup>.  
 90 Interestingly, the latter suggests intensive drying in that region during the last decades, which  
 91 seems to contradict our results for the Central Europe region (Figure S3; ME). However, this is  
 92 related to large spatial variability in Central Europe; if we further partition the ME region and  
 93 focus on Czech lands (15-20°E, 48-52°N), then a dryness increase can be seen. Similar  
 94 discrepancies were found for the Alps<sup>8</sup> and France<sup>9</sup>, which were studies of specific sites.  
 95

| Region                  | Citation              | Index                  | Agreement                                                        | Discrepancy                                  |
|-------------------------|-----------------------|------------------------|------------------------------------------------------------------|----------------------------------------------|
| <b>Mediterranean</b>    | Cook et al. 2016      | scPDSI                 | Analysis of OWDA in the Mediterranean                            | -                                            |
| <b>Czech Lands</b>      | Brázdil et al. 2016   | SPEI, Z-index, scPDSI  | Recent and 1800 dryness                                          | 1700-1750                                    |
| <b>Scandinavia</b>      | Seftigen et al. 2015  | SPEI                   | Pluvial 1500-1600, Summer NAO                                    | 1600-1700 [subdecadal, both pluvial and dry] |
| <b>Scandinavia</b>      | Drobyshev et al. 2015 | LFY (large fire years) | Dry in 1800, Summer NAO                                          | -                                            |
| <b>Spain</b>            | Tejedor et al. 2016   | SPI                    | 1750, 1803, 1808, 1870, 1980 droughts, 1760, 1820, 1975 pluvials | 1950 drought                                 |
| <b>United Kingdom</b>   | Spraggs et al. 2015   | Runoff                 | 1855, 1935 droughts                                              | -                                            |
| <b>Alpes (1 site)</b>   | Kress et al. 2014     | DRI                    | -                                                                | 900-1100 drought, 1900-2000 pluvial          |
| <b>France (2 sites)</b> | Labuhn et al. 2015    | SPEI                   | -                                                                | Disagree                                     |

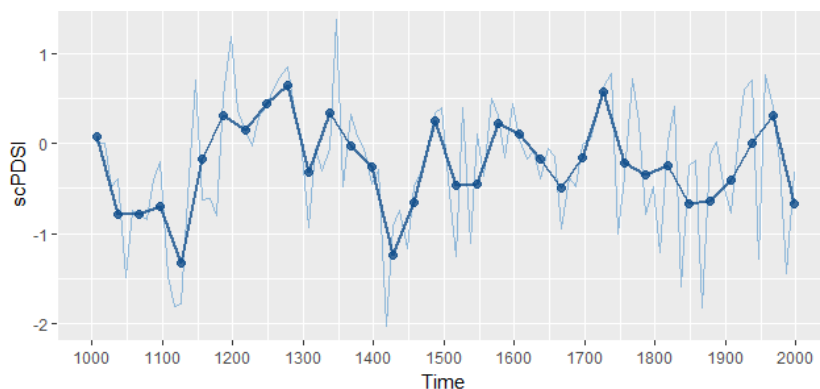

96 **Figure 10.** Hydroclimatic conditions (scPDSI) over the well-studied Czech region (15-20°E, 48-  
 97 52°N), in 10-year (light blue line) and 30-year (dark blue line) scale.  
 98

99    References

- 100    1. Pauling, A., J. Luterbacher, C. Casty, and H. Wanner (2006), Five hundred years of gridded  
101        high-resolution precipitation reconstructions over Europe and the connection to large-scale  
102        circulation, *Climate Dynamics*, 26(4), 387–405.
- 103    2. Cook, B. I., K. J. Anchukaitis, R. Touchan, D. M. Meko, and E. R. Cook (2016),  
104        Spatiotemporal drought variability in the Mediterranean over the last 900 years, *Journal of*  
105        *Geophysical Research: Atmospheres*.
- 106    3. Tejedor, E., M. de Luis, J. M. Cuadrat, J. Esper, and M. Á. Saz (2016), Tree-ring-based  
107        drought reconstruction in the Iberian Range (east of Spain) since 1694, *International journal*  
108        *of biometeorology*, 60(3), 361–372.
- 109    4. Drobyshev, I., Y. Bergeron, A. de Vernal, A. Moberg, A. A. Ali, and M. Niklasson (2016),  
110        Atlantic SSTs control regime shifts in forest fire activity of Northern Scandinavia, *Scientific*  
111        *reports*, 6.
- 112    5. Seftigen, K., J. Björklund, E. R. Cook, and H. W. Linderholm (2015), A tree-ring field  
113        reconstruction of Fennoscandian summer hydroclimate variability for the last millennium,  
114        *Climate Dynamics*, 44(11–12), 3141–3154.
- 115    6. Spraggs, G., L. Peaver, P. Jones, and P. Ede (2015), Re-construction of historic drought in  
116        the Anglian Region (UK) over the period 1798–2010 and the implications for water  
117        resources and drought management, *Journal of Hydrology*, 526, 231–252.
- 118    7. Brázdil, R., P. Dobrovolný, M. Trnka, U. Büntgen, L. Řezníčková, O. Kotyza, and others  
119        (2016), Documentary and instrumental-based drought indices for the Czech Lands back to  
120        AD 1501, *Climate Research*, 70(2–3), 103–117.
- 121    8. Kress, A., S. Hangartner, H. Bugmann, U. Büntgen, D. C. Frank, M. Leuenberger, R. T.  
122        Siegwolf, and M. Saurer (2014), Swiss tree rings reveal warm and wet summers during  
123        medieval times, *Geophysical Research Letters*, 41(5), 1732–1737.
- 124    9. Labuhn, I., V. Daux, O. Girardclos, M. Stievenard, M. Pierre, and V. Masson-Delmotte (2016),  
125        French summer droughts since 1326 CE: a reconstruction based on tree ring cellulose  $\delta$  18  
126        O, *Climate of the Past*, 12(5), 1101–1117.
